# Supplementary material for: An Interactive Parent-Targeted Text Messaging Intervention to Improve Oral Health in Children Attending Urban Pediatric Clinics: Feasibility Randomized Controlled Trial
Source: PubMed Central journal article supplement (PMC6878100; doi:10.2196/14247), 2019-11-11
Supplement: mhealth_v7i11e14247_app1.pdf [file mhealth_v7i11e14247_app1.pdf]

Multimedia Appendix 1. Engagement and interaction with the text message program over time.

|             | <u>OHT</u>                |                                     |                     | <u>CWT</u>                |                                     |                     |
|-------------|---------------------------|-------------------------------------|---------------------|---------------------------|-------------------------------------|---------------------|
|             | Total<br>Response<br>Rate | Assessment<br>Response<br>Rate n=28 | User<br>Interaction | Total<br>Response<br>Rate | Assessment<br>Response<br>Rate n=27 | User<br>Interaction |
| <b>Time</b> |                           |                                     |                     |                           |                                     |                     |
| Week-1      | 93/138<br>(67.4%)         | 82%                                 | 81                  | 98/142<br>(69.0%)         | 78%                                 | 95                  |
| Week-2      | 145/191<br>(75.9%)        | 71%                                 | 64                  | 107/120<br>(89.2%)        | 70%                                 | 76                  |
| Week-3      | 128/193<br>(66.3%)        | 64%                                 | 59                  | 90/113<br>(79.6%)         | 74%                                 | 56                  |
| Week-4      | 131/184<br>(71.2%)        | 68%                                 | 40                  | 102/137<br>(74.5%)        | 78%                                 | 62                  |
| Week-5      | 153/272<br>(56.3%)        | 71%                                 | 58                  | 258/323<br>(79.9%)        | 74%                                 | 75                  |
| Week-6      | 114/158<br>(72.2%)        | 64%                                 | 50                  | 148/192<br>(77.1%)        | 63%                                 | 39                  |
| Week-7      | 136/207<br>(65.7%)        | 57%                                 | 52                  | 177/229<br>(77.3%)        | 63%                                 | 39                  |
| Week-8      | 140/169<br>(82.8%)        | 68%                                 | 35                  | 187/207<br>(90.3%)        | 74%                                 | 33                  |

*Note.* OHT = oral health texts, CWT = child wellness texts. Total Response Rate = number of participants' responses/number of expected responses; Assessment Response Rate = number of participants responding to assessment texts/number of participants; User Interaction = number of unsolicited texts sent by participants (see Methods for details).
