# Supplementary material for: An Interactive Parent-Targeted Text Messaging Intervention to Improve Oral Health in Children Attending Urban Pediatric Clinics: Feasibility Randomized Controlled Trial
Source: PubMed Central journal article supplement (PMC6878100; doi:10.2196/14247), 2019-11-11
Supplement: mhealth_v7i11e14247_app2.pdf [file mhealth_v7i11e14247_app2.pdf]

Multimedia Appendix 2. Changes in child brushing over time in the OHT group

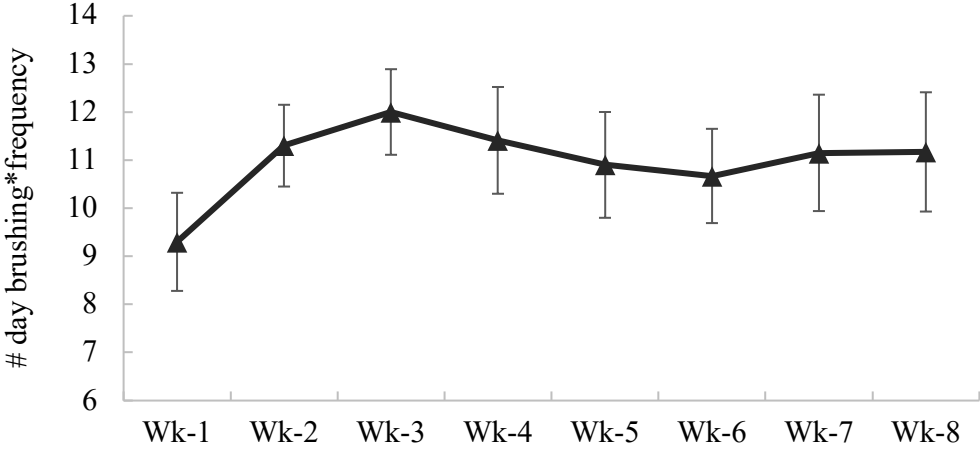

*Note.* OHT = oral health texts, Wk = week. Wk-1 *n* = 22, Wk-2 *n* = 18, Wk-3 *n* = 18, Wk-4 *n* = 19, Wk-5 *n* = 20, Wk-6 *n* = 18, Wk-7 *n* = 16, Wk-8 *n* = 19.
